# Supplementary material
Source: MDPI journal article supplement (https://www.mdpi.com/2072-4292/15/24/5768)

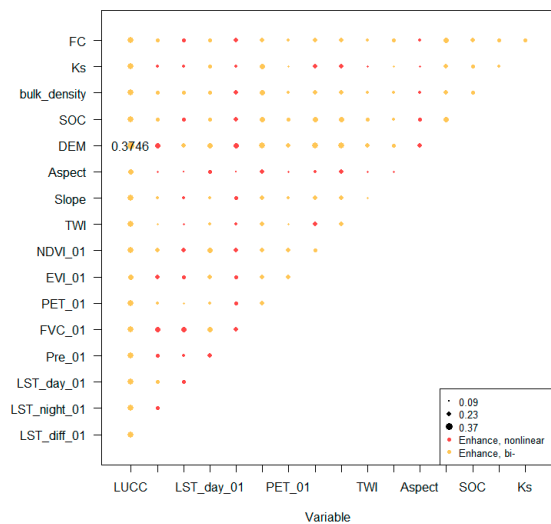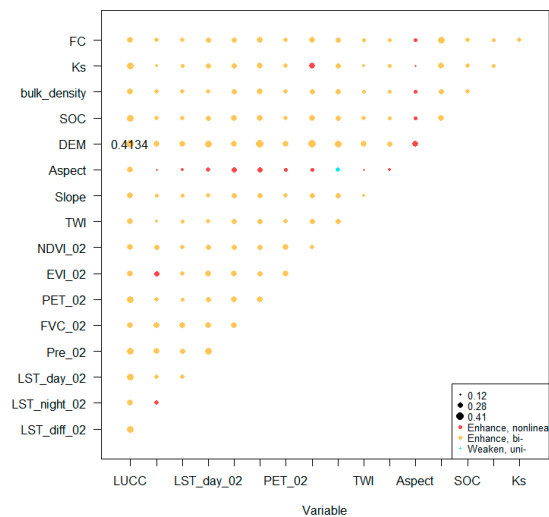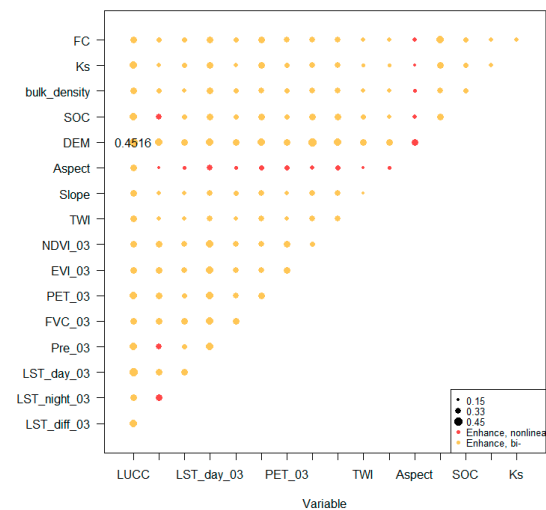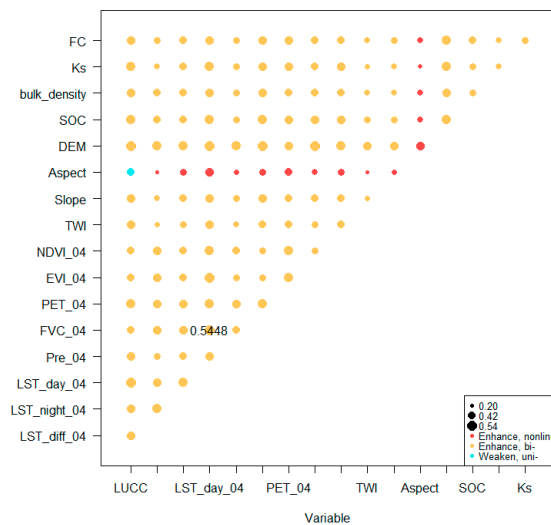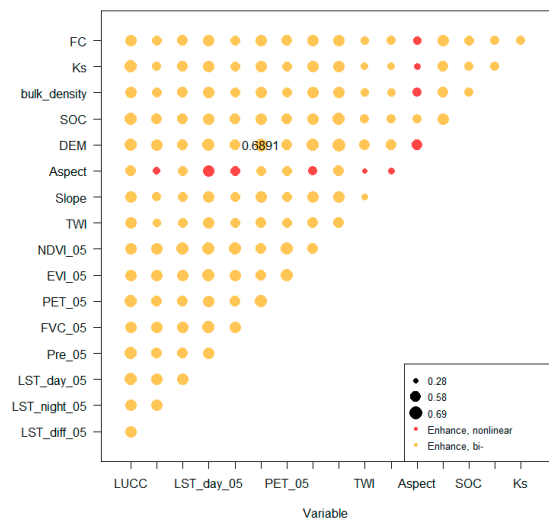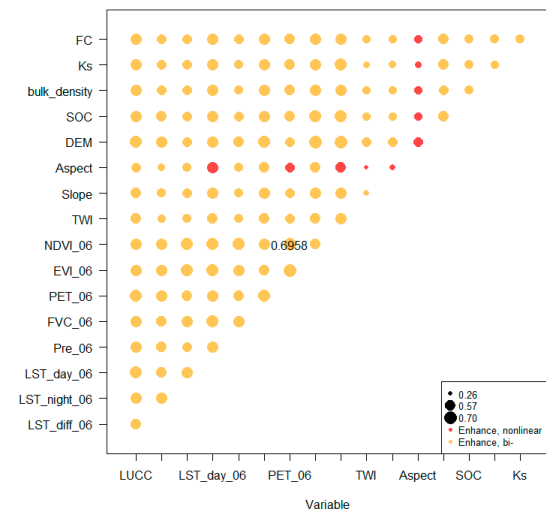

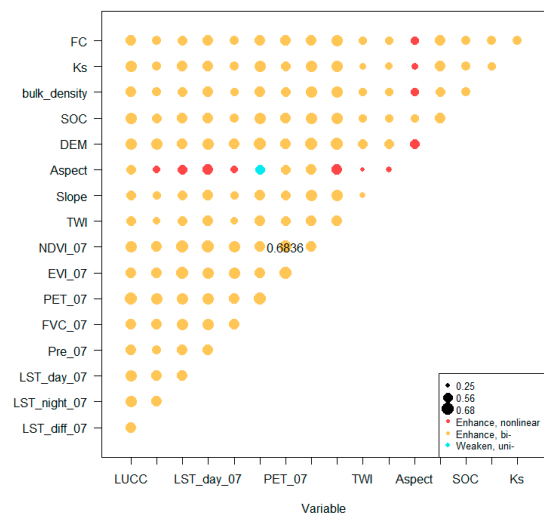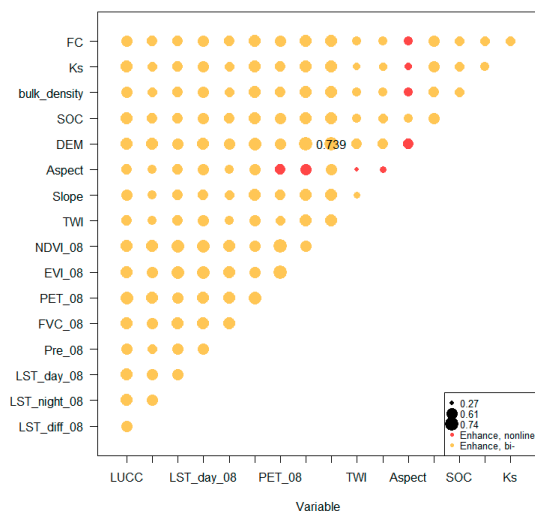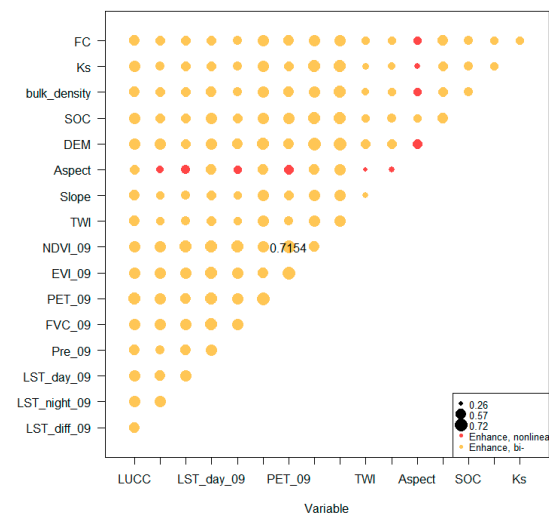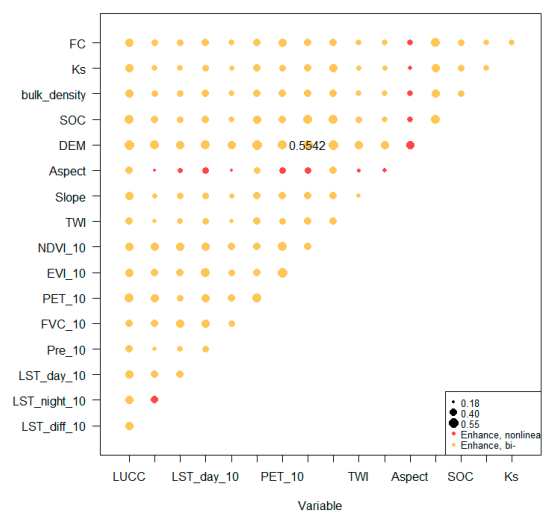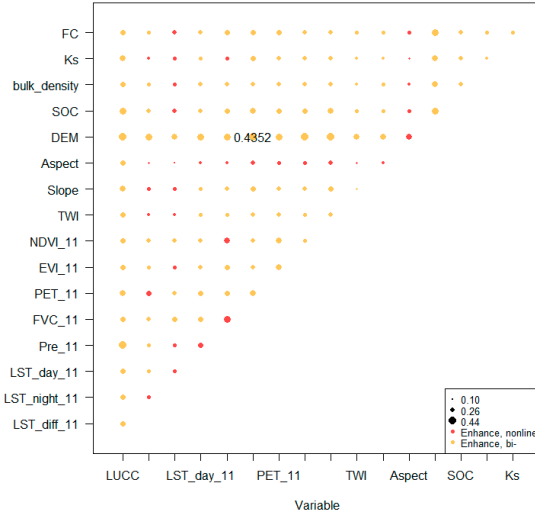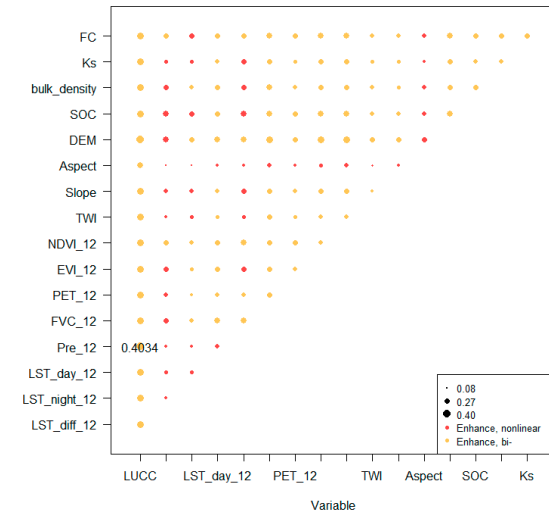

Figure S1-S12. Interaction detector results for each month

Supplement: s1 [file s1 › remotesensing-2715004-supplementary.pdf]
